# Supplementary material for: A Fast and Interpretable Deep Learning Approach for Accurate Electrostatics-Driven pKa Predictions in Proteins
Source: PubMed Central journal article supplement — J Chem Theory Comput. 2022 Jul 15;18(8):5068–78. doi: 10.1021/acs.jctc.2c00308 (PMC9369009; doi:10.1021/acs.jctc.2c00308), 2022-07-15
Supplement: ct2c00308_si_001.pdf [file ct2c00308_si_001.pdf]

## Supplementary Information

# A fast and interpretable deep learning approach for accurate electrostatics-driven $pK_a$ predictions

Pedro B.P.S. Reis,<sup>\*,†</sup> Marco Bertolini,<sup>‡</sup> Floriane Montanari,<sup>‡</sup> Walter Rocchia,<sup>¶</sup>

Miguel Machuqueiro,<sup>\*,†</sup> and Djork-Arné Clevert<sup>\*,‡</sup>

<sup>†</sup>*BioISI - Biosystems & Integrative Sciences Institute, Faculty of Sciences, University of  
Lisboa, Campo Grande, 1749-016 Lisboa, Portugal*

<sup>‡</sup>*Bayer A.G., Machine Learning Research, Berlin, Germany*

<sup>¶</sup>*CONCEPT Lab, Istituto Italiano di Tecnologia, Via E. Melen 83, 16152 - Genova, Italy*

E-mail: pdreis@ciencias.ulisboa.pt; machuque@ciencias.ulisboa.pt; djork-arne.clevert@bayer.com

## List of Figures

|    |                                                                                                                                                                                                                                                                                                                                                                                                                                                         |     |
|----|---------------------------------------------------------------------------------------------------------------------------------------------------------------------------------------------------------------------------------------------------------------------------------------------------------------------------------------------------------------------------------------------------------------------------------------------------------|-----|
| S1 | Performance of pKAI+ with different regularization weights on 5 folds of the experimental test set. . . . .                                                                                                                                                                                                                                                                                                                                             | S7  |
| S2 | RMSE variation versus the magnitude of the $pK_a$ shift ( $\Delta pK_a$ ). The calculations were performed for pKAI and Null model using the PypKa predictions as reference. . . . .                                                                                                                                                                                                                                                                    | S7  |
| S3 | pKAI+ performance at predicting experimental $pK_a$ values dependency on the magnitude of solvent exposure (SASA) of the residues. . . . .                                                                                                                                                                                                                                                                                                              | S8  |
| S4 | Accuracy of several methods at predicting the most representative protonation states derived from experimental $pK_a$ values. . . . .                                                                                                                                                                                                                                                                                                                   | S8  |
| S5 | pKAI accuracy at predicting PypKa-derived protonation states. . . . .                                                                                                                                                                                                                                                                                                                                                                                   | S9  |
| S6 | Impact of changing the distance of the closest atom on pKAI's predictions for: residue GLU-154 from structure 6FT4 (A); residue LYS-118 from structure 2HRK (C); residue TYR-98 from structure 6FT4 (C); residue LYS-55 from structure 2BJU (D). For reference, we have included PypKa's predictions of the same residue in the state presented in the experimental structure and in an modified structure in which the closest atom is absent. . . . . | S10 |

## List of Tables

|    |                                                                                                                                                                                                                                                                                                                                                                |    |
|----|----------------------------------------------------------------------------------------------------------------------------------------------------------------------------------------------------------------------------------------------------------------------------------------------------------------------------------------------------------------|----|
| S1 | PDB identification codes of the proteins in experimental test set. . . . .                                                                                                                                                                                                                                                                                     | S4 |
| S2 | Performance comparison between the Null model (RMSE) and pKAI (RMSE; percentage of errors below 0.5 pH units). Information about the distribution of residue $pK_a$ shifts ( $\Delta pK_a$ ) and relative solvent accessible surface area ( $SASA_r$ ) in the test data is also shown. The Null model was calculated with $\Delta pK_a$ equal to zero. . . . . | S4 |

|    |                                                                                                                                                                                                                                                                                                                                                                                                                                                                                                                                                                                                                                                                                                                  |    |
|----|------------------------------------------------------------------------------------------------------------------------------------------------------------------------------------------------------------------------------------------------------------------------------------------------------------------------------------------------------------------------------------------------------------------------------------------------------------------------------------------------------------------------------------------------------------------------------------------------------------------------------------------------------------------------------------------------------------------|----|
| S3 | Execution time comparison between PypKa and pKAI. This benchmark was executed on a machine with a single Intel Xeon E5-2620 processor. . . . .                                                                                                                                                                                                                                                                                                                                                                                                                                                                                                                                                                   | S5 |
| S4 | Experimental $pK_a$ benchmark of several methods on a data set of 736 residues from 97 proteins. For each method, we report their RMSE, the mean absolute error (MAE), the 0.9 quantile, the error percentage below 0.5 $pK$ units, and the coefficient of determination ( $R^2$ ). The null model values have been taken from. <sup>1,2</sup> . . . . .                                                                                                                                                                                                                                                                                                                                                         | S5 |
| S5 | Comparison between Null model and pKAI+ RMSE values. The Null model is defined as the $pK_a$ values of the residues in water taken from Reference 1.                                                                                                                                                                                                                                                                                                                                                                                                                                                                                                                                                             | S5 |
| S6 | One hot encoding classes of all atoms used. . . . .                                                                                                                                                                                                                                                                                                                                                                                                                                                                                                                                                                                                                                                              | S6 |
| S7 | RMSE improvement by adding a solvent exposure-related extra feature to the input layer. Different ways of measuring solvent exposure were tested: Half-sphere exposure (HSE), Coordination Number, Residue Depth, and relative solvent accessible surface area ( $SASA_r$ ). HSE is a 2D measure and be subdivided into an upper (side chain facing, $HSE^{up}$ ) and lower sphere (backbone facing, $HSE^{down}$ ) half-spheres. Furthermore, two residues can be used as reference $C_\alpha$ ( $HSE_\alpha$ ) and $C_\beta$ ( $HSE_\beta$ ). Residue depth is the average distance of all residue's atoms to the molecular surface, and $Residue\ Depth_{C_\alpha}$ is the atom depth of $C_\alpha$ . . . . . | S6 |

# Results

Table S1: PDB identification codes of the proteins in experimental test set.

|      |      |      |      |      |      |      |      |
|------|------|------|------|------|------|------|------|
| 135l | 1a2p | 1a6m | 1a9l | 1a93 | 1ans | 1b2v | 1bcx |
| 1beo | 1bhc | 1bi6 | 1bni | 1bpi | 1bus | 1bvi | 1cdc |
| 1d0d | 1div | 1duk | 1dwr | 1eh6 | 1epg | 1era | 1ert |
| 1eru | 1ex3 | 1ey0 | 1fks | 1fna | 1goa | 1gs9 | 1h4g |
| 1hho | 1hng | 1hpx | 1hrc | 1i0v | 1igd | 1igv | 1jbb |
| 1kxi | 1l54 | 1lni | 1lys | 1lz1 | 1mbc | 1nfn | 1nzp |
| 1p5f | 1pnt | 1poh | 1ppf | 1ppo | 1ptd | 1qh7 | 1qlp |
| 1rga | 1rgg | 1sap | 1stg | 1stn | 1trs | 1trw | 1ubq |
| 1wla | 1xnb | 1ymb | 1yph | 1ypi | 1ypt | 2bca | 2bus |
| 2cpl | 2hnp | 2igd | 2lzm | 2lzt | 2ovo | 2sni | 2tga |
| 2trx | 2zta | 3ebx | 3egf | 3fx5 | 3icb | 3nbs | 3rn3 |
| 3srn | 3ssi | 4icb | 4lzt | 4ma9 | 4mbn | 4pti | 6gst |
| 6lyz |      |      |      |      |      |      |      |

Table S2: Performance comparison between the Null model (RMSE) and pKAI (RMSE; percentage of errors below 0.5 pH units). Information about the distribution of residue  $pK_a$  shifts ( $\Delta pK_a$ ) and relative solvent accessible surface area ( $SASA_r$ ) in the test data is also shown. The Null model was calculated with  $\Delta pK_a$  equal to zero.

| Residue | Abundance (%) | Null                      | pKAI                      | Error < 0.5 (%) | $\Delta pK_a$ |       | $SASA_r$ |       |
|---------|---------------|---------------------------|---------------------------|-----------------|---------------|-------|----------|-------|
|         |               | RMSE                      | RMSE                      |                 | Avg           | Stdev | Avg      | Stdev |
| GLU     | 24.9          | 1.42                      | 0.44                      | 84.7            | -0.7          | 1.2   | 0.43     | 0.24  |
| LYS     | 22.5          | 1.04                      | 0.32                      | 92.1            | 0.6           | 0.9   | 0.47     | 0.23  |
| ASP     | 21.9          | 1.74                      | 0.50                      | 80.5            | -1.0          | 1.4   | 0.40     | 0.26  |
| TYR     | 13.9          | 3.14                      | 0.69                      | 67.5            | 2.4           | 2.1   | 0.19     | 0.20  |
| HIS     | 9.4           | 1.92                      | 0.67                      | 73.1            | -1.0          | 1.6   | 0.29     | 0.25  |
| CYS     | 3.9           | 3.30                      | 0.82                      | 56.6            | 2.8           | 1.8   | 0.11     | 0.17  |
| NTR     | 1.7           | 0.74                      | 0.28                      | 94.2            | -0.3          | 0.7   | 0.75     | 0.27  |
| CTR     | 1.8           | 0.88                      | 0.35                      | 92.5            | -0.2          | 0.9   | 0.74     | 0.27  |
| All     | 100.0         | 1.89 (1.24 <sup>a</sup> ) | 0.52 (0.31 <sup>a</sup> ) | 81.2            | 0.0           | 1.9   | 0.38     | 0.27  |

<sup>a</sup> Mean Absolute Error (MAE)

Table S3: Execution time comparison between PypKa and pKAI. This benchmark was executed on a machine with a single Intel Xeon E5-2620 processor.

| Protein | Number of residues / titratable | Execution Time (s) |      | Speedup Factor | Time per residue / titratable (s) |             |
|---------|---------------------------------|--------------------|------|----------------|-----------------------------------|-------------|
|         |                                 | PypKa              | pKAI |                | PypKa                             | pKAI        |
| 4LZT    | 129/21                          | 26.5               | 0.8  | 33×            | 0.21/ 1.26                        | 0.006/0.038 |
| 4K5C    | 341/100                         | 92.0               | 1.2  | 76×            | 0.27/ 0.92                        | 0.004/0.012 |
| 7C8J    | 902/249                         | 2898.2             | 2.3  | 1260×          | 3.21/11.64                        | 0.003/0.009 |

Table S4: Experimental  $pK_a$  benchmark of several methods on a data set of 736 residues from 97 proteins. For each method, we report their RMSE, the mean absolute error (MAE), the 0.9 quantile, the error percentage below 0.5  $pK$  units, and the coefficient of determination ( $R^2$ ). The null model values have been taken from.<sup>1,2</sup>

|        | RMSE | MAE  | Quantile 0.9 | Error < 0.5 (%) | $R^2$ |
|--------|------|------|--------------|-----------------|-------|
| Null   | 1.09 | 0.72 | 1.51         | 52.3            | 0.84  |
| PypKA  | 1.07 | 0.71 | 1.48         | 52.6            | 0.85  |
| PROPKA | 1.11 | 0.73 | 1.58         | 51.1            | 0.84  |
| pKAI   | 1.15 | 0.75 | 1.66         | 49.3            | 0.82  |
| pKAI+  | 0.98 | 0.64 | 1.37         | 55.0            | 0.87  |

Table S5: Comparison between Null model and pKAI+ RMSE values. The Null model is defined as the  $pK_a$  values of the residues in water taken from Reference 1.

| Residue | Abundance (%) | Null RMSE | pKAI+ RMSE | Error < 0.5 (%) | $\Delta pK_a$ |       | SASA <sub>r</sub> |       |
|---------|---------------|-----------|------------|-----------------|---------------|-------|-------------------|-------|
|         |               |           |            |                 | Avg           | Stdev | Avg               | Stdev |
| GLU     | 29.6          | 0.77      | 0.81       | 58.3            | -0.5          | 0.9   | 0.45              | 0.24  |
| LYS     | 14.4          | 0.74      | 0.68       | 60.4            | 0.3           | 0.6   | 0.55              | 0.21  |
| ASP     | 29.2          | 1.30      | 1.08       | 59.5            | -0.6          | 0.9   | 0.45              | 0.25  |
| TYR     | 2.4           | 1.23      | 0.95       | 38.9            | 0.5           | 0.7   | 0.33              | 0.25  |
| HIS     | 19.4          | 1.14      | 0.97       | 42.0            | -0.5          | 1.1   | 0.39              | 0.22  |
| CYS     | 1.2           | 3.39      | 3.43       | 0.0             | -0.1          | 1.5   | 0.11              | 0.09  |
| NTR     | 1.5           | 0.59      | 0.47       | 63.6            | -0.3          | 0.8   | 0.74              | 0.20  |
| CTR     | 2.2           | 0.41      | 0.56       | 75.0            | -0.1          | 0.7   | 0.77              | 0.23  |
| TOTAL   | 100.0         | 1.09      | 0.98       | 55.0            | -0.4          | 1.0   | 0.46              | 0.25  |

<sup>a</sup> Mean Absolute Error (MAE)

Table S6: One hot encoding classes of all atoms used.

| Atom Name | Residue    | Atom Classes |
|-----------|------------|--------------|
| N         | Main Chain | N            |
| O         | Main Chain | O            |
| NE2       | GLN        | N_AMIDE      |
| ND2       | ASN        | N_AMIDE      |
| OE1       | GLN        | O_AMIDE      |
| OD1       | ASN        | O_AMIDE      |
| NE        | ARG        | NE_ARG       |
| NH1/NH2   | ARG        | NH_ARG       |
| NZ        | LYS        | NZ_LYS       |
| N         | NTR        | NZ_LYS       |
| OXT       | CTR        | O_COOH       |
| OD1/OD2   | ASP        | O_COOH       |
| OE1/OE2   | GLU        | O_COOH       |
| OG        | SER        | OG_SER       |
| OG1       | THR        | OG1_THR      |
| ND1       | HIS        | ND1_HIS      |
| NE2       | HIS        | NE2_HIS      |
| NE1       | TRP        | NE1_TRP      |
| OH        | TYR        | OH_TYR       |
| SG        | CYS        | SG_CYS       |
| SD        | Methionine | SD_MET       |

Table S7: RMSE improvement by adding a solvent exposure-related extra feature to the input layer. Different ways of measuring solvent exposure were tested: Half-sphere exposure (HSE), Coordination Number, Residue Depth, and relative solvent accessible surface area ( $SASA_r$ ). HSE is a 2D measure and be subdivided into an upper (side chain facing,  $HSE^{up}$ ) and lower sphere (backbone facing,  $HSE^{down}$ ) half-spheres. Furthermore, two residues can be used as reference  $C_\alpha$  ( $HSE_\alpha$ ) and  $C_\beta$  ( $HSE_\beta$ ). Residue depth is the average distance of all residue’s atoms to the molecular surface, and Residue Depth $_{C_\alpha}$  is the atom depth of  $C_\alpha$ .

| Feature                     | RMSE Improvement |
|-----------------------------|------------------|
| $HSE_\alpha^{up}$           | 0.01             |
| $HSE_\alpha^{down}$         | 0.01             |
| $HSE_\beta^{up}$            | 0.01             |
| $HSE_\beta^{down}$          | 0.02             |
| Coordination Number         | 0.02             |
| Residue Depth               | 0.01             |
| Residue Depth $_{C_\alpha}$ | 0.01             |
| $SASA_r$                    | 0.02             |

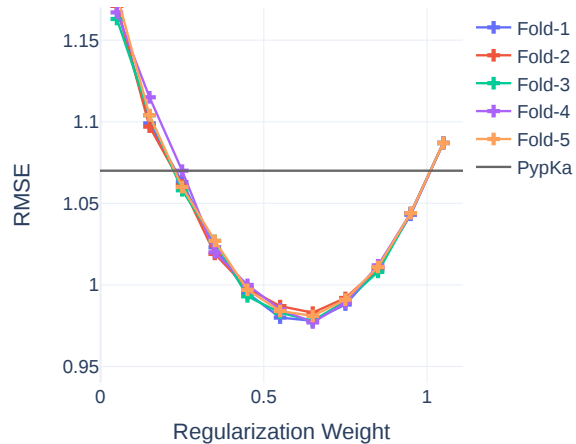

Figure S1: Performance of pKAI+ with different regularization weights on 5 folds of the experimental test set.

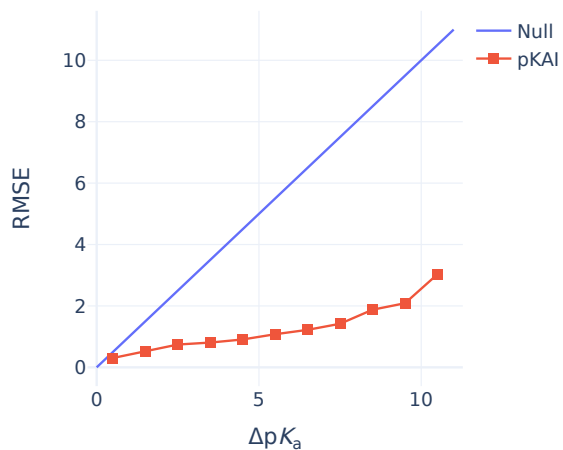

Figure S2: RMSE variation versus the magnitude of the  $pK_a$  shift ( $\Delta pK_a$ ). The calculations were performed for pKAI and Null model using the PypKa predictions as reference.

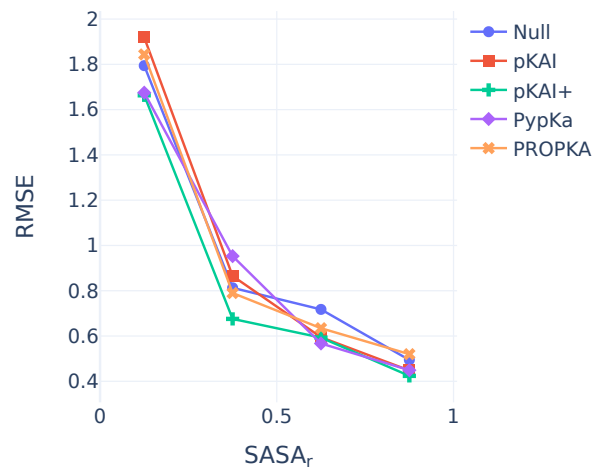

Figure S3: pKAI+ performance at predicting experimental  $pK_a$  values dependency on the magnitude of solvent exposure (SASA) of the residues.

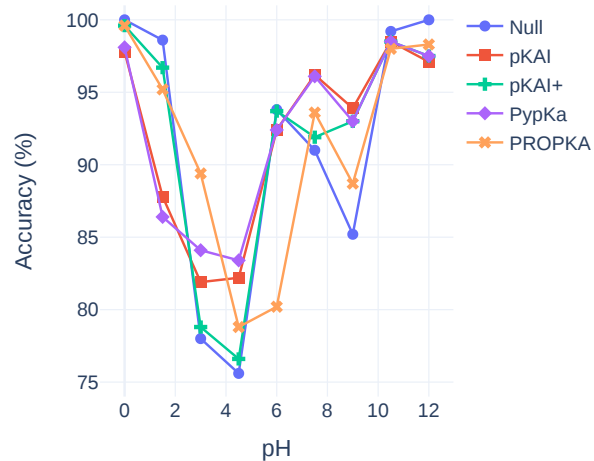

Figure S4: Accuracy of several methods at predicting the most representative protonation states derived from experimental  $pK_a$  values.



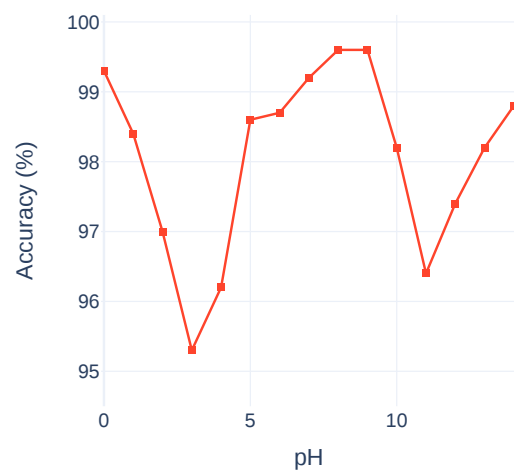

Figure S5: pKAI accuracy at predicting PypKa-derived protonation states.

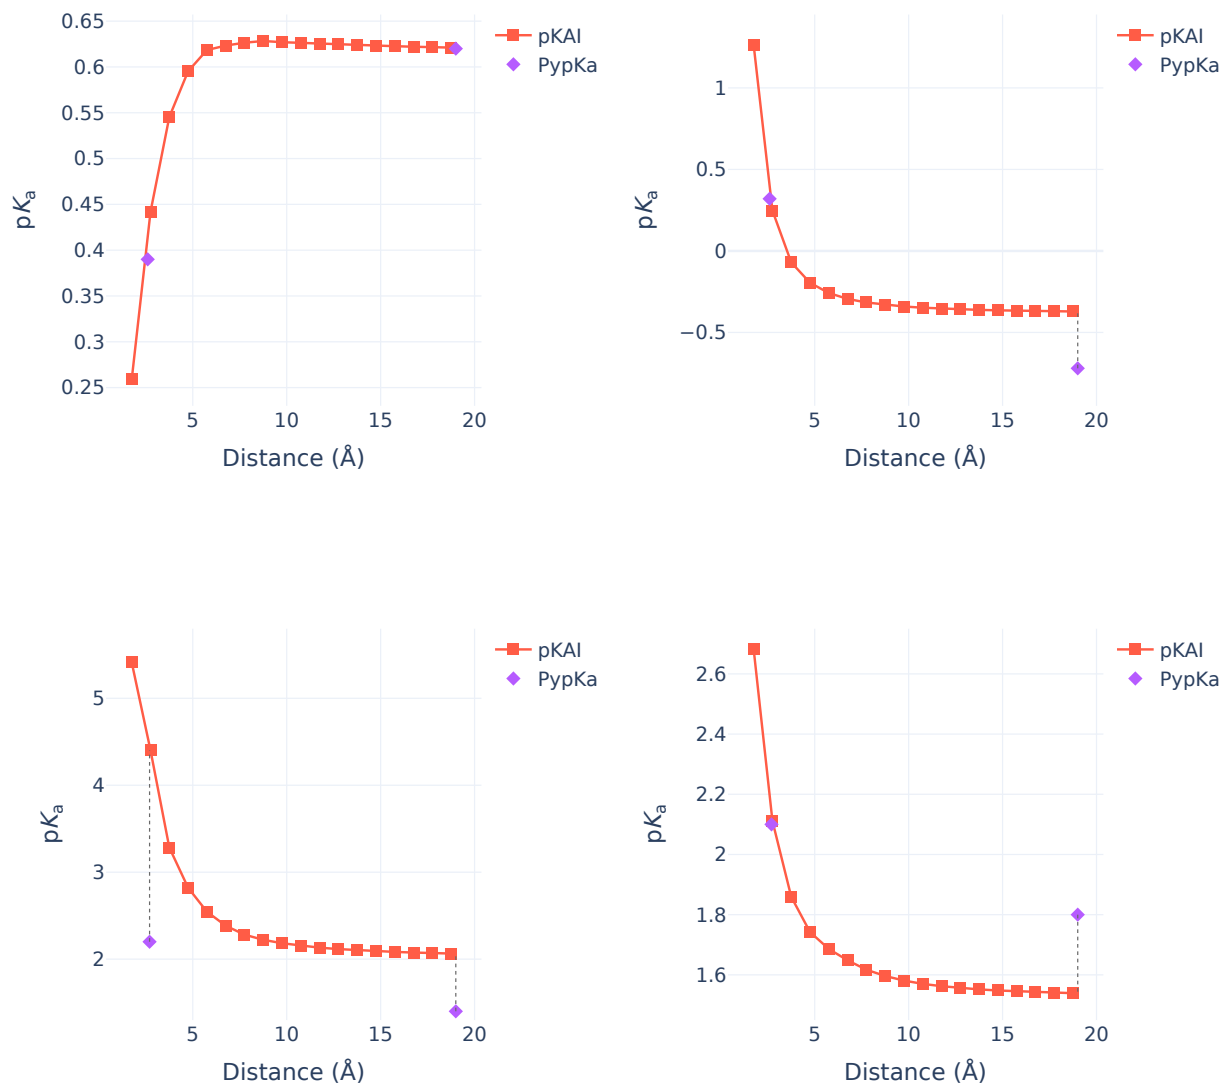

Figure S6: Impact of changing the distance of the closest atom on pKAI's predictions for: residue GLU-154 from structure 6FT4 (A); residue LYS-118 from structure 2HRK (C); residue TYR-98 from structure 6FT4 (C); residue LYS-55 from structure 2BJU (D). For reference, we have included PypKa's predictions of the same residue in the state presented in the experimental structure and in an modified structure in which the closest atom is absent.

## References

- (1) Thurlkill, R. L.; Grimsley, G. R.; Scholtz, J. M.; Pace, C. N. p*K* values of the ionizable groups of proteins. *Protein Sci.* **2006**, *15*, 1214–1218.
- (2) Grimsley, G. R.; Scholtz, J. M.; Pace, C. N. A summary of the measured p*K* values of the ionizable groups in folded proteins. *Protein Sci.* **2009**, *18*, 247–251.
